# Supplementary material for: Towards efficient verifiable multi-keyword search over encrypted data based on blockchain
Source: PeerJ journal article supplement (doi:10.7717/peerj-cs.930), 2022-03-21
Supplement: Towards_Efficient_Verifiable_Multi_Keyword_Search_over_Encrypted_Data_based_on_Blockchain.pdf [file Towards_Efficient_Verifiable_Multi_Keyword_Search_over_Encrypted_Data_based_on_Blockchain.pdf]

# Towards Efficient Verifiable Multi-Keyword Search over Encrypted Data based on Blockchain

Wan Shan Xu<sup>1,2</sup>, Jian Biao Zhang<sup>1,2</sup>, Yi Lin Yuan<sup>1,2</sup>, Xiao Wang<sup>3</sup>, Yan Hui Liu<sup>1,2</sup>, Muhammad Irfan Khalid<sup>1,2</sup>

<sup>1</sup> Faculty of Information Technology, Beijing University of Technology, Beijing, China

<sup>2</sup> Beijing Key Laboratory of Trusted Computing, Beijing, China

<sup>3</sup> Department of Information Science and Technology, Tianjin University of Finance and Economics, Tianjin, China

Corresponding Author:

Jian Biao Zhang<sup>1,2</sup>

100 Pingyuan Park, Beijing, 100124, China

Email address: zjb@bjut.edu.cn

## Abstract

Searchable symmetric encryption (SSE) provides an effective way to search encrypted data stored on untrusted servers. As we all known, the server is not trusted, so it is indispensable to verify the results returned by it. However, the existing SSE schemes either lack fairness in the verification of search results, or do not support the verification of multiple keywords. To address this, we design a multi-keyword verifiable searchable symmetric encryption scheme based on blockchain, which provides an efficient multi-keyword search and fair verification of search results. We utilize bitmap to build search index in order to improve search efficiency, and use blockchain to ensure fair verification of search results. The bitmap and hash function are combined to realize lightweight multi-keyword search result verification, compared with the existing verification schemes using public key cryptography primitives, our scheme reduces the verification time and improves the verification efficiency. In addition, our scheme supports the dynamic update of files and realizes the forward security in update. Finally, formal security analysis proves that our scheme is secure against Chosen-Keyword Attacks (CKA), experimental analysis demonstrates that our scheme is efficient and viable in practice.

## Introduction

With the development of artificial intelligence, Internet of things, Internet of vehicles and other emerging technologies, more and more enterprises and individuals outsource local data to the cloud, thereby reducing storage and management overhead. However, security and privacy concerns still hinder the deployment of cloud storage system. Although data encryption can eradicate such concerns to some extent, it becomes difficult for users to search over the data.

40 Searchable symmetric encryption (SSE) provides an efficient mechanism to solve this, which  
41 enables users to search encrypted data efficiently without decryption. Since SSE was first proposed  
42 by Song (Song, Wagner & Perrig, 2000), how to perform efficient and versatile search on  
43 encrypted data has always been an important research direction. The existing SSE schemes mainly  
44 use linked lists and vectors to build indexes, the cloud server needs to traverse the whole list or  
45 vector to search for matching results during a query, which incurs high search overhead. In addition  
46 to efficient search, dynamic updates are also very important in SSE. (Zhang, Katz & Papamanthou, 2016)  
47 has shown that adversaries can infer the critical information through the file injection attacks  
48 during the dynamic update of the SSE, while the forward-secure SSE can avoid this. Therefore,  
49 the forward security of the scheme must be fully considered when designing the SSE scheme.

50 Verifiability of the search results is another important research issue for SSE. Since The cloud  
51 server is untrusted, which may returns incorrect or incomplete results due to system failures or  
52 cost savings, so, it is necessary to verify the search results. In 2012, (Qi & Gong, 2012) proposed  
53 the concept of verifiable SSE (VSSE) and constructed a verifiable SSE scheme based on word tree.  
54 Following this work, a great many VSSE schemes are proposed (Kurosawa & Ohtaki, 2012; Zhu, Liu  
55 & Wang, 2016; Liu et.al 2017; Zhang et.al 2019;Chen et.al 2021). In these schemes, the verification is  
56 mainly performed by users, but the user may forge verification results to save costs, so the  
57 reliability of the verification cannot be guaranteed. To address this, some researchers(Hu et.al 2018;  
58 Li et.al 2019; Guo, Zhang & Jia , 2020) introduce blockchain into SSE to verify search results,  
59 which guarantees the fairness and reliability of the verification. Although blockchain achieves fair  
60 verification of search results, but the existing schemes are only for a single keyword, and there is  
61 little research on fair verification for multi-keywords.

62 In this paper, we introduce a verifiable multi-keyword SSE scheme based on blockchain, which  
63 can perform efficient multi-keyword search, ensures the fairness of verification, and supports the  
64 dynamic update of files. To our knowledge, this is the first scheme to verify the search results of  
65 multi-keywords fairly. In general, the contributions of this paper are summarized as follows:

- 66 • Our scheme realizes efficient multi-keyword search and verification of search results, at the  
67 same time, our scheme supports dynamic update of files and achieves forward security.
- 68 • Our scheme utilizes blockchain to verify the search results, ensuring the reliability and fairness  
69 of the verification results. Combining bitmap index and hash function, we realize lightweight  
70 multi-keyword verification to improve verification efficiency.
- 71 • We formally prove that our scheme is adaptively secure against CKA, and we conduct a series  
72 of experiments to evaluate the performance of our scheme.

73

## 74 **Related Works**

### 75 **Searchable Symmetric Encryption**

76 Since SSE was proposed, a number of works have been done to improve search efficiency, rich  
77 expression and advanced security. The first SSE scheme (Song, Wagner & Perrig, 2000) enables  
78 users to search keywords through full-text scanning, search time increases linearly with the size of  
79 files, which is impractical and inefficient. To improve efficient, Curtmola et.al (2006) proposed an

80 inverted index SSE, which achieves sub-linear search time, and gives a definition of SSE security,  
81 but this scheme does not support dynamic operations. Wang, Cao & Ren (2010) expanded the  
82 scheme of Curtmola et.al (2006) to support dynamic operations, and proved that the scheme was  
83 adaptively secure against chosen-keyword attacks (CKA2-secure). For the schemes that support  
84 dynamic operation, forward security is critically crucial. The research of Cash et.al (2013) and  
85 Zhang, Katz & Papamanthou (2016) indicated that in the SSE scheme without forward security, the  
86 adversary can recover most of the sensitive information in ciphertext at a small cost, their research  
87 shows the importance of forward security.

88 Multi-keyword search is a crucial means to improve search efficiency. In single-keyword search  
89 scheme (Song, Wagner & Perrig,2000; Curtmola et.al, 2006; Wang, Cao & Ren, 2010), the server returns  
90 some irrelevant results, while the multi-keyword search (Cash et.al, 2013; Lai et.al, 2018; Xu et.al,  
91 2019;Liang et.al 2020;Liang et.al 2021) gains higher search accuracy and more accurate results.  
92 To further improve search efficiency, Abdelraheem et.al (2016) proposed an SSE scheme on  
93 encrypted bitmap indexes to support multi-keyword search, but requires two rounds of interactions  
94 with the cloud server. Zuo et.al (2019) proposed a secure SSE scheme based on bitmap index  
95 which supports dynamic operations with forward and backward security, but this scheme lacks the  
96 verification of the results.

97

### 98 **Verifiable Searchable Symmetric Encryption**

99 In SSE, it is necessary to verify the results since the server is untrusted. Qi & Gong (2012) proposed  
100 the concept of verifiable searchable symmetric encryption (VSSE) and constructed a VSSE  
101 scheme based on word tree. Along this direction, some other VSSE schemes (Kurosawa & Ohtaki,  
102 2012; Zhu, Liu & Wang ,2016; Liu et.al ,2017,Miao et.al 2021) are proposed. These schemes are  
103 the verification of single keyword search results, Azraoui et.al (2015) combined polynomial-based  
104 accumulators and Merkle trees to achieve conjunctive keyword verification. Wan & Deng (2018)  
105 used homomorphic MAC to verify the results of multi-keyword search. Li et.al (2021) utilized  
106 bitmap index to gain high efficiency of multi-keyword search, and verified the results by RSA  
107 accumulator. Ge et.al (2021) and Liu et.al (2021) proposed their verifiable schemes in the Internet  
108 of things. These schemes verify the results of multi-keyword search by public key cryptography  
109 primitives, which is computationally expensive and inefficient. What is more, these multi-keyword  
110 search verifiable schemes mainly focus on verifying the returned files are valid and whether the  
111 files really contains the query keywords, but they didn't ensure all files containing the query  
112 keywords are returned.

113

### 114 **Verifiable Searchable Symmetric Encryption Based on Blockchain**

115 In the existing SSE schemes, the verification of search results is performed by users. However,  
116 users may forge verification results for economic benefits, which damages the fairness of  
117 verification. To solve this, a flexible and feasible method is to adopt blockchain to verify search  
118 results, which uses the non-repudiable property of the blockchain to ensure the reliability and  
119 fairness of verification. Hu et.al (2018) built a distributed, verifiable and fair ciphertext retrieval

120 scheme based on blockchain. Li et.al (2019) proposed a verifiable scheme combined blockchain  
121 and SSE, which can verify the results automatically and reduce the calculation of users. Guo,  
122 Zhang & Jia (2020) used the blockchain to realize the public authentication of search results, and  
123 ensures forward security of dynamic update. Although these schemes realize the fair verification  
124 of search results, but they are mainly for single keyword search, whereas there is little research on  
125 the fair verification of multi-keyword. Comparison results with existing schemes are shown in  
126 Table 1.

127

## 128 Preliminaries

### 129 Bitmap

130 To improve search efficiency, we use the bitmap (Spiegler & Maayan, 1985) to build inverted index.  
131 Bitmap uses a binary string to store a set of information, which can effectively save storage space,  
132 and it has been widely used in the field of ciphertext retrieval. In our scheme, each keyword  $w_i$   
133 corresponds to a bitmap, which contains  $\ell$  bits,  $\ell$  is the number of files in the system, if the  $i$ -th  
134 document contains  $w_i$  the value of  $\ell$  in position  $i$  is 1, otherwise 0. For example, there are four  
135 files  $(f_1, f_2, f_3, f_4)$  and two keywords  $(w_1, w_2)$ , in Fig.1,  $w_1$  is contained in  $f_1$  and  $f_3$ ,  $w_2$  is  
136 contained in  $f_2$  and  $f_3$ , the bitmap of  $w_1$  and  $w_2$  are 1010 and 0110. If we want to search files  
137 that contains both  $w_1$  and  $w_2$ , we need to do AND operation on the two bitmaps, i.e.  
138  $1010 \wedge 0110 = 0010$ , that indicates that  $f_3$  contains both  $w_1$  and  $w_2$ .

139

### 140 Blockchain

141 Blockchain is a distributed database, which is widely used in emerging cryptocurrencies to store  
142 transaction information such as bitcoin. The blockchain has the features of decentralization,  
143 transparency and unforgeability. There is no central server in the blockchain, all nodes participate  
144 in the operation and generate the calculation results, the information stored on the blockchain can  
145 be seen by all nodes in the network. All nodes of the blockchain share the same data record, under  
146 the action of the consensus mechanism, a single node cannot modify the data stored on the chain.  
147 The above characteristics of blockchain make it suitable to be a trusted third party for fair  
148 verification.

149

## 150 Method

### 151 System Model

152 The system model of our scheme is shown in Fig.2, there are four entities in the system: data owner,  
153 cloud server, data user, blockchain. For the files  $\mathbf{F}$  in the system, data owner extracts all keywords  
154 and generates a keyword set  $\mathbf{W}$ . Data owner encrypts files to a database  $T$ , builds an encrypted  
155 index  $T_B$  and a checklist  $B$ ,  $T_B$  and  $T$  are sent to cloud server,  $T_B$  and  $B$  are sent to blockchain.  
156 When a data user joins the system, it sends an authentication request to the data owner, obtains

157 keys and system parameters. During a query, the data user generates search token  $TK_{i,Q}$  according  
 158 to the keywords to be queried with the help of keys and system parameters, and then sends it to  
 159 cloud server and blockchain, respectively. Cloud server provides storage services for index  $T_B$   
 160 and  $T$ . In addition, the cloud server performs ciphertext retrieval according to the search token  
 161  $TK_{i,Q}$ , and sends the matched results to blockchain for verification.

162 To verify the search results of multiple keywords, the blockchain performs two steps: 1)  
 163 benchmark. On receiving  $TK_{i,Q}$ , the blockchain performs multi-keyword search on the index  $T_B$   
 164 to get the identifiers  $ID$  of files that meets the query, then gets the corresponding hash values  $\mathbb{H}$   
 165 of files from the checklist  $B$  according  $ID$ , and computes the benchmark  $Acc$  using  $\mathbb{H}$ ; 2)  
 166 verification. After receiving the results returned by cloud server, the blockchain computes the hash  
 167 values  $\mathbb{H}'$  of results and computes the verification value  $Acc'$ , then the blockchain compares  
 168  $Acc$  and  $Acc'$  to generate the proof. The proof and search results are sent to data user, the  
 169 verification is completed.

170

## 171 Threat Model

172 Like other verifiable SSE schemes (Soleimanian & Khazaei, 2019), we assume that the cloud server  
 173 is malicious, which may return an incorrect or incomplete search result for selfish reasons, such as  
 174 saving bandwidth or storage space. In addition, we assume that the data user is also untrusted,  
 175 since it may forge the verification results for economic benefits. The data owner and blockchain  
 176 are trusted, they execute the protocols in the system honestly.

177

## 178 Algorithm Definitions

179 Our scheme includes eight polynomial time algorithms,  $\Pi = \{\text{Keygen}, \text{Setup}, \text{ClientAuth}$   
 180  $\text{TokenGen}, \text{Search}, \text{Verify}, \text{UpdateToken}, \text{Update}\}$ , and the details are as follows:

- 181 •  $K \leftarrow \text{KeyGen}(1^\lambda)$ , takes system parameter  $\lambda$  as input, and outputs system keys  $K$ .
- 182 •  $(T, T_B, B) \leftarrow \text{Setup}(K, \mathbf{W}, \mathbf{F})$ , takes system keys  $K$ , the keyword set  $\mathbf{W}$  and the set of files  
 183  $\mathbf{F}$  as input, outputs a database of encrypted files  $T$ , an encrypted index  $T_B$  and a checklist  $B$ .
- 184 •  $(K_1, \Sigma) \leftarrow \text{ClientAuth}(\mathbb{A}_i)$ , takes the attribute  $\mathbb{A}_i$  of user as input, outputs secret key  $K_1$  and  
 185 the keyword status  $\Sigma$ .
- 186 •  $TK_{i,Q} \leftarrow \text{TokenGen}(K_1, \overline{\mathbf{W}})$ , takes secret key  $K_1$ , a set of keywords to query  $\overline{\mathbf{W}} = \{w_1, w_2, \dots,$   
 187  $w_t\}$ , outputs the search token  $TK_{i,Q}$ .
- 188 •  $(R, Acc) \leftarrow \text{Search}(T, T_B, B, TK_{i,Q})$ , takes search token  $TK_{i,Q}$ , the encrypted database  $T$ ,  
 189 encrypted index  $T_B$  and the checklist  $B$  as input, and outputs the search results  $R$  and the  
 190 benchmark  $Acc$ .

- 191 •  $(R, proof) \leftarrow \text{Verify}(R, Acc)$ , takes the search results  $R$ , and the benchmark  $Acc$  as input,
- 192 outputs the verification proof  $proof$  and results  $R$ .
- 193 •  $(\tau_s, \tau_b) \leftarrow \text{UpdateToken}(\bar{\mathbf{F}}, \mathbf{W}', K)$ , takes the set of files to update  $\bar{\mathbf{F}}$ , the set of keywords  $\mathbf{W}'$
- 194 and system keys  $K = \{K_1, K_2, K_3\}$  as input, and outputs the update token  $(\tau_s, \tau_b)$ .
- 195 •  $(\mathbf{T}', \mathbf{T}_B', \mathbf{B}') \leftarrow \text{Update}(\mathbf{T}, \mathbf{T}_B, \mathbf{B}, \tau_s, \tau_b)$ , takes encrypted database  $\mathbf{T}$ , encrypted index  $\mathbf{T}_B$  and
- 196 the update token  $(\tau_s, \tau_b)$  as input, outputs the updated database  $\mathbf{T}'$ , updated index  $\mathbf{T}_B'$  and the
- 197 updated checklist  $\mathbf{B}'$ .

198

## 199 Security Definitions

200 We prove the security of our scheme with the random oracle model, which can be executed by two  
 201 probabilistic games  $\text{Real}_{\mathcal{A}}(\lambda)$  and  $\text{Ideal}_{\mathcal{A}, \mathcal{S}}(\lambda)$ , and we have the following definitions:

202 **Definition 1** : CKA2-security, for the verifiable multi-keyword search scheme  
 203  $\Pi = \{\text{KeyGen}, \text{Setup}, \text{ClientAuth}, \text{TokenGen}, \text{Search}, \text{Verify}, \text{Update}\}$ , let  $\mathcal{L} = \{\mathcal{L}_{\text{setup}}, \mathcal{L}_{\text{search}}, \mathcal{L}_{\text{update}}\}$  be  
 204 the leakage function,  $\mathcal{A}$  is the adversary and  $\mathcal{S}$  is the simulator, there are two probabilistic  
 205 experiments:

206  $\text{Real}_{\mathcal{A}}(\lambda)$  : The challenger runs  $\text{KeyGen}(1^\lambda)$  to generate secret key  $K = \{K_1, K_2, K_3\}$ , the  
 207 adversary  $\mathcal{A}$  outputs  $\mathbf{F}$  and  $\mathbf{W}$ . The challenger triggers this experiment to run  $\text{Setup}(K, \mathbf{W}, \mathbf{F})$ ,  
 208 outputs the index  $\mathbf{T}_B, \mathbf{T}$  and  $\mathbf{B}$ , which are sent to  $\mathcal{A}$ .  $\mathcal{A}$  generates a series of adaptive queries  
 209  $Q = \{q_1, q_2, \dots, q_t\}$ , for each  $q_i \in Q$ , the challenger generates search or update tokens,  $\mathcal{A}$  receives  
 210 those tokens and generates a bit  $b$  as the output of this experiment.

211  $\text{Ideal}_{\mathcal{A}, \mathcal{S}}(\lambda)$ : The adversary  $\mathcal{A}$  outputs  $\mathbf{F}$  and  $\mathbf{W}$ , the simulator  $\mathcal{S}$  generates the index  $\mathbf{T}_B, \mathbf{T}$   
 212 and  $\mathbf{B}$  through  $\mathcal{L}_{\text{Setup}}$ ,  $\mathcal{A}$  receives them.  $\mathcal{A}$  generates a series of adaptive queries  
 213  $Q = \{q_1, q_2, \dots, q_t\}$ , for each  $q_i \in Q$ , the simulator  $\mathcal{S}$  generates search or update tokens with  $\mathcal{L}_{\text{Search}}$   
 214 and  $\mathcal{L}_{\text{Update}}$ ,  $\mathcal{A}$  receives those tokens and generates a bit  $b$  as the output of this experiment.

215 If for any probabilistic polynomial time (PPT) adversary  $\mathcal{A}$ , there exist an efficient simulator  
 216  $\mathcal{S}$ , which satisfies that:

$$217 |\Pr[\text{Real}_{\mathcal{A}}(\lambda) = 1] - \Pr[\text{Ideal}_{\mathcal{A}, \mathcal{S}}(\lambda) = 1]| \leq \text{negl}(\lambda)$$

218 , we say  $\Pi$  is  $\mathcal{L}$ -secure against CKA2, where  $\text{negl}$  is a negligible function and  $\lambda$  is the  
 219 security parameter.

220

## 221 Construction

222 In this section, we present the construction of our scheme in detail. We take bitmap as index  
 223 structure to achieve efficient search over encrypted data, and use blockchain to verify the search

224 results. The bitmap is utilized to build the inverted index to achieve the optimal search time  
 225  $\mathcal{O}(|q|)$ , where  $q$  is the keywords in search and  $|q|$  is the number of  $q$ .

226 In our scheme, the blockchain is used to fairly verify the search results. In Setup, the data owner  
 227 calculates the hash value of files, generates a checklist  $B$  and saves it on the blockchain. During  
 228 the verification, the blockchain smart contract computes the hash values of search results returned  
 229 by the server and compares them with the existing results to obtain the verification results.

230 Specifically, in the single keyword setting, the blockchain stores the corresponding benchmark  
 231 directly since the results corresponding to the keywords are determined. However, it's impossible  
 232 in multi-keyword search because the search results are variable, which can only store the  
 233 verification value of each file. To ensure the credibility of the search results, the blockchain also  
 234 needs to perform multi-keyword search to obtain the search results. Therefore, we save the index  
 235  $T_B$  on the blockchain. During a query, the blockchain executes multi-keyword search to get the  
 236 search results, and read the verification value  $hash_i$  of each file in search results to generate the  
 237 benchmark  $Acc$ , then the blockchain compares  $Acc$  with search results returned by cloud server  
 238 to complete the verification.

239

## 240 Proposed Construction

241 Our scheme contains eight algorithms  $\Pi = \{\text{KeyGen}, \text{Setup}, \text{ClientAuth}, \text{TokenGen}, \text{Search}, \text{Verify}$   
 242  $\text{UpdateToken}, \text{Update}\}$ , let  $F: \{0,1\}^* \rightarrow \{0,1\}^m$ ,  $H: \{0,1\}^* \rightarrow \{0,1\}^n$  be two Pseudo-Random  
 243 Functions (PRFs), the constructions of our scheme are as follows.

244  $K \leftarrow \text{KeyGen}(1^\lambda)$ : This algorithm is executed by the data owner, given a security parameter  
 245  $\lambda \in \mathbb{N}$ , this algorithm generates the secret key  $K = \{K_1, K_2, K_3\}$ , where  $K_1, K_2, K_3 \xleftarrow{\$} \{0,1\}^\lambda$ ,  $K_1, K_2$   
 246 are used to encrypt the bitmap index for each keyword  $w_i \in \mathbf{W}$ ,  $K_3$  is used to encrypt files  $f_i \in \mathbf{F}$   
 247 and store the hash value of files.

248  $(T, T_B, B) \leftarrow \text{Setup}(K, \mathbf{W}, \mathbf{F})$ : Given a set of files  $\mathbf{F}$ , a set of keywords  $\mathbf{W}$  and the secret keys  
 249  $K$ , this algorithm builds an encrypted index  $T_B$ , a checklist  $B$  and a ciphertext database  $T$ , as is  
 250 shown in Algorithm 1. For each file  $f_i \in \mathbf{F}$ ,  $id_i$  is the identifier of  $f_i$ , the data owner encrypts  $f_i$  by  
 251 calculating  $c_i \leftarrow \text{Enc}(K_3, f_i)$ , and computes the hash value using  $hash_i \leftarrow H(c_i)$ . Then data owner  
 252 stores  $c_i$  and  $hash_i$  in  $T[l_i]$  and  $B[l_i]$ , respectively.

253 For each keyword  $w_i \in \mathbf{W}$ , data owner generates a bitmap  $\mathcal{B}_{w_i}$ , if  $id_j$  contains keyword  $w_i$ ,  
 254 then  $\mathcal{B}_{w_i}[m] = 1$ , where  $m = H(id_j \| K_3)$ , and the other positions of  $\mathcal{B}_{w_i}$  are all 0's. The data owner  
 255 encrypts  $\mathcal{B}_{w_i}$  through  $v_B \leftarrow \mathcal{B}_{w_i} \oplus H(t_w \| st_{i+1})$ , and store  $v_B$  in  $T_B[t_w]$ . At the end of the Setup,  
 256  $(T_B, B)$  and  $(T, T_B)$  are sent and stored on blockchain and cloud server, respectively.

257  $(K_1, \Sigma) \leftarrow \mathbf{ClientAuth}(\mathbb{A}_i)$ : It needs to register to the data owner when a new data user who  
 258 wants to query files on the cloud server joins the system. The data user submits attribute  $\mathbb{A}_i$  to the  
 259 data owner through this algorithm to obtain the keyword status  $\Sigma$  and the key  $K_1$ .

260  $TK_{i,Q} \leftarrow \mathbf{TokenGen}(K_1, \overline{W})$ : It takes the key  $K_1$  and the set of keywords to query  
 261  $\overline{W} = \{w_1, w_2, \dots, w_t\}$  as input, output a search token  $TK_{i,Q}$ , as is shown in Algorithm2. For each  
 262 keyword  $w_i \in \overline{W}$ , the data user computes the position  $l_{w_i}$  of  $w_i$  in index  $T_B$  as  $l_{w_i} \leftarrow H(u_{w_i} \parallel st_i)$ ,  
 263 where  $u_{w_i} \leftarrow F(K_1, H_1(w_i))$ ,  $st_i \leftarrow \Sigma[w_i]$ . Data user sends  $TK_{i,Q}$  to cloud server and blockchain,  
 264 respectively.

265  $(R, Acc) \leftarrow \mathbf{Search}(T, T_B, B, TK_{i,Q})$ : This algorithm takes search token  $TK_{i,Q}$ , index  $T_B$  and  
 266 ciphertext database  $T$  as input, and outputs search results  $R$ . On receiving the search token, the  
 267 cloud server and blockchain perform the same operations for multi-keyword search. They all parse  
 268 out the position  $l_{w_i}$  of the keyword in the token  $TK_{i,Q}$ , and get the bitmap  $\mathcal{B}_{w_i}$  through  
 269  $\mathcal{B}_{w_i} \leftarrow v_B \oplus H(K_{w_i} \parallel l_i)$ ,  $v_B \leftarrow T_B[l_{w_i}]$ . To achieve multi-keyword search, they compute  
 270  $\mathcal{B} = \mathcal{B}_1 \wedge \mathcal{B}_2 \wedge \dots \wedge \mathcal{B}_t$ , the cloud server gets files in  $T$  according to  $\mathcal{B}$  with regard to  $\mathcal{B}[i]=1$ , and  
 271 sends them to the blockchain to verify. Similarly, the blockchain gets hash values  
 272  $\{hash_1, hash_2, \dots, hash_s\}$  of files in  $B$  according to  $\mathcal{B}$ , computes  $Acc = hash_1 \oplus hash_2 \oplus \dots \oplus hash_s$   
 273 as the benchmark for verification, and the details are shown in Algorithm 2.

274  $(R, proof) \leftarrow \mathbf{Verify}(R, Acc)$ : This algorithm takes search results  $R$  and benchmark  $Acc$  as  
 275 input, outputs search results  $R$  and  $proof$ , and the verify process is shown in Algorithm 3. To  
 276 verify the integrity of files, the data owner calculates the hash value of each file through  
 277  $hash_i \leftarrow H(c_i)$  in the Setup, and adds  $hash_i$  to the checklist  $B$ , then  $B$  is sent to the blockchain.  
 278 Through algorithm **Search**, the blockchain gets the search result of multiple keywords, obtains the  
 279 hash value of each file in the result from  $B$ , and computes the benchmark  $Acc$ . To verify the search  
 280 results, the blockchain calculates  $H_{\overline{W}}$  of  $R$  and compares it with  $Acc$ .

281 In Algorithm 3, for all ciphertexts  $c_i \in R$ , blockchain computes  $H_{\overline{W}} \leftarrow H_{\overline{W}} \oplus H(c_i)$ , where  
 282  $H(c_i)$  denotes the hash value of  $c_i$ . Blockchain compares  $H_{\overline{W}}$  and  $Acc$ , if they are equal, the  
 283 proof is true, otherwise false. At last, the search results  $R$  and proof are sent to data user. During  
 284 the verification,  $Acc$  is calculated through the hash value stored on the blockchain, due to the  
 285 unforgeability of blockchain, thus  $Acc$  is unforgeable. In addition, the verification is completed  
 286 by the blockchain, so the proof is also unforgeable, which ensures the fairness of verification.  
 287

288  $(\tau_s, \tau_b) \leftarrow \mathbf{UpdateToken}(\overline{F}, W', K)$ : The data owner generates an update token through this  
 289 algorithm, which takes files  $\overline{F}$ , a keyword set  $W'$  and secret key  $K$  as input, and outputs update

290 token  $(\tau_s, \tau_b)$ . For files  $f_k \in \bar{F}$ , the data owner encrypts and calculates the hash value of  $f_k$  by  
 291  $c_k \leftarrow \text{Enc}(K_3, f_k)$  and  $hash_k \leftarrow H(c_k)$ , respectively. For keywords  $W' = \{w_1, w_2, \dots, w_s\}$  that  
 292 contained in  $f_k$ , the data owner generates a bitmap  $\mathcal{B}_{w_j}$  for each  $w_j \in W'$ , and encrypts  $\mathcal{B}_{w_j}$  with  
 293  $v_B \leftarrow \mathcal{B}_{w_j} \oplus H(l_{w_j} \parallel st)$ , where  $l_{w_j} \leftarrow H(u_{w_j} \parallel st)$ ,  $u_{w_j} \leftarrow F(K_1, H(w_j))$ ,  $st \leftarrow F(K_2, st_0)$ .

294  $(T', T_B', B') \leftarrow \text{Update}(T, T_B, B, \tau_s, \tau_b)$ : This algorithm takes encrypted database  $T$ , index  $T_B$ ,  
 295 checklist  $B$ , update token  $(\tau_s, \tau_b)$  as input, and outputs updated database  $T'$ , updated index  $T_B'$   
 296 and updated checklist  $B'$ . The details are shown in Algorithm 4.

297

### 298 **Forward security**

299 As described above, dynamic update is the foundation function of an SSE scheme, and forward  
 300 security is an indispensable component of dynamic update. In Algorithm 4, when updating a file  
 301  $f_i$  that contains keyword  $w_j$ , the data owner retrieves the previous state  $st_0$  from the local state  
 302 store  $\Sigma$ , and generates a new state  $st$  through  $st \leftarrow F(K_2, st_0)$ , where  $F$  is a pseudo random  
 303 function and  $K_2$  is kept in local. To search a keyword  $w_j$ , the data user retrieves the current state  
 304  $st_0$  from  $\Sigma$ , with  $st_0$  data user generates a token to be sent to the cloud server and blockchain.  
 305 Without the key  $K_2$ , the server cannot compute the current state  $st$  from a previous state  $st_0$ ,  
 306 therefore it cannot get the current token from a previous, considering that the newly added file  $f_i$   
 307 corresponds to the current token, that means the previous tokens cannot match  $f_i$ , then forward  
 308 security is achieved.

309

### 310 **Security Analysis**

311 In this section, we analysis the security of our scheme. For the scheme  $\Pi = \{\text{KeyGen}, \text{Setup},$   
 312  $\text{ClientAuth}, \text{TokenGen}, \text{Search}, \text{Verify}, \text{UpdateToken}, \text{Update}\}$  with the leakage function  
 313  $\mathcal{L} = \{\mathcal{L}_{\text{setup}}, \mathcal{L}_{\text{search}}, \mathcal{L}_{\text{update}}\}$ , we prove that our scheme is  $\mathcal{L}$ -secure against CKA2 by proving that  
 314  $\text{Real}_{\mathcal{A}}(\lambda)$  and  $\text{Ideal}_{\mathcal{A}, \mathcal{S}}(\lambda)$  are computationally indistinguishable.

315 **Theorem 1.** Our scheme  $\Pi$  is  $\mathcal{L}$ -secure against CKA2, if the encryption algorithm is secure  
 316 against chosen-plaintext attacks and the pseudo-random function  $F$  and  $H$  are secure pseudo-  
 317 random.

318 **Proof:** We use a probabilistic polynomial time simulator  $\mathcal{S}$  to simulate indexes and a series of  
 319 tokens. For a PPT adversary  $\mathcal{A}$ , we prove theorem 1 by the computational indistinguishability  
 320 between  $\text{Real}_{\mathcal{A}}(\lambda)$  and  $\text{Ideal}_{\mathcal{A}, \mathcal{S}}(\lambda)$ . In  $\text{Real}_{\mathcal{A}}(\lambda)$ ,  $\mathcal{A}$  gets indexes  $(T_B, T$  and  $B)$ , searches token  
 321  $TK_{i,Q}$  and updates token  $(\tau_s, \tau_b)$  by running Setup, TokenGen and UpdateToken; in  
 322  $\text{Ideal}_{\mathcal{A}, \mathcal{S}}(\lambda)$ ,  $\mathcal{A}$  gets indexes  $(T_B', T'$  and  $B')$ , searches token  $TK_{i,Q}'$  and updates token  $(\tau_s', \tau_b')$

323 by running  $\mathcal{L}_{Setup}, \mathcal{L}_{Search}, \mathcal{L}_{Update}$ . We prove that  $\text{Real}_{\mathcal{A}}(\lambda)$  and  $\text{Ideal}_{\mathcal{A},\mathcal{S}}(\lambda)$  are computational  
324 indistinguishable by proving that  $(T_B, T, B, TK_{i,Q}, \tau_s, \tau_b)$  and  $(T_B', T', B', TK_{i,Q}', \tau_s', \tau_b')$  are  
325 indistinguishable.

326 **Simulating index.**  $\mathcal{S}$  initializes three empty tables:  $T', B', T_B'$ , which are used to store file  
327 ciphertexts, verification values and bitmaps, respectively.  $\mathcal{S}$  randomly selects a string  $f_i'$  of  
328 length  $|f_i|$ , and encrypts it through  $c_i' \leftarrow \text{Enc}(K_3, f_i')$ , where  $K_3$  is randomly sampled from  
329  $\{0,1\}^\lambda$ .  $\mathcal{S}$  maintains three mappings:  $H, U$  and  $L$ ,  $H$  stores  $(id_i \| K_3, \ell_i')$ ,  $U$  stores  $(H(w_i), u_{w_i}')$ ,  
330 and the mapping  $L$  stores  $(u_{w_i} \| st_i, t_{w_i}')$ .  $H, U$  and  $L$  are used and updated by the generation of  
331 search and update token.  $\mathcal{S}$  computes the hash value  $hash_i' \leftarrow H(c_i')$ ,  $c_i'$  is stored in  $T[l_i']$  and  
332  $hash_i'$  is stored in  $B[l_i']$ .  $\mathcal{S}$  selects a string  $v_{B_j}'$  of length  $|v_{B_j}|$ , and stores it in  $T_B'[t_{w_i}] \leftarrow v_{B_j}$ .

333  $T', B'$  and  $T_B'$  are simulated by  $\mathcal{S}$  through the leakage  $\mathcal{L}_{Setup}$ , the difference between  $(T_B',$   
334  $T', B')$  and  $(T_B, T, B)$  is the generation of  $(f_i', c_i', v_{B_j}')$ . In ideal environment,  $(f_i', c_i', v_{B_j}')$  are  
335 randomly selected, since our encryption algorithm is secure against CKA2,  $F$  and  $H$  are secure  
336 pseudo-random functions, therefore, the probability that the adversary  $\mathcal{A}$  can distinguish between  
337 the real environment and the ideal environment is negligible.

338 **Simulating search token.** For the keyword  $w_i$  to query,  $\mathcal{S}$  gets  $u_{w_i}'$  from the mapping  $U$   
339 through calculating  $H(w_i)$ ,  $\mathcal{S}$  checks whether  $u_{w_i}'$  is contained in  $U$ , if so returns the  
340 corresponding entity, otherwise randomly picks a  $u_{w_i}'$  in  $\{0,1\}^\ell$  and stores  $(H(w_i), u_{w_i}')$  in  $U$ .  
341 Similarly, the experiment gets  $l_{w_i}'$  from  $L$  by  $L[u_{w_i} \| st_i]$ , the search token  $TK_{i,Q}' = \{l_{w_i}'\}$ . Under  
342 the assumption that  $F$  and  $H$  are secure pseudo-random functions, the adversary  $\mathcal{A}$  cannot  
343 distinguish  $TK_{i,Q}$  and  $TK_{i,Q}'$ .

344 **Simulating update token.** For file  $f_k$  to be added,  $\mathcal{S}$  first randomly selects a bit string  $c_k'$  of  
345 length  $|f_k|$ , and encrypts it through  $c_k' \leftarrow \text{Enc}(K_3, f_k')$ .  $\mathcal{S}$  computes the hash value  
346  $hash_k' \leftarrow H(c_k')$ ,  $c_k'$  is stored in  $T[l_k']$  and  $hash_k'$  is stored in  $B[l_k']$ , where  $l_k'$  is obtained  
347 from the mapping  $H$ .  $\mathcal{S}$  maintains a mapping  $E$ , which stores  $(st_0, st)$ , if there is no  
348 corresponding entity for  $st$ , it randomly picks a  $st$  in  $\{0,1\}^l$ , otherwise it returns the corresponding  
349 entity.  $\mathcal{S}$  gets  $u_{w_i}'$  and  $l_{w_i}'$  as in search token, selects a string  $v_{B_j}'$  of length  $|v_{B_j}|$ , and stores it in  
350  $T_B'[l_{w_j}] \leftarrow v_{B_j}'$ . The update token  $(\tau_s' = \{(l_k', c_k'), (l_{w_j}', v_{B_j}')\}, \tau_b' = \{(l_k', hash_k'), (l_{w_j}', v_{B_j}')\})$   
351 and  $(\tau_s = \{(l_k, c_k), (l_{w_j}, v_{B_j})\}, \tau_b = \{(l_k, hash_k), (l_{w_j}, v_{B_j})\})$  are indistinguishable for the adversary  
352  $\mathcal{A}$ .

353 In such a way,  $(T_B, T, B, TK_{i,Q}, \tau_s, \tau_b)$  and  $(T_B', T', B', TK_{i,Q}', \tau_s', \tau_b')$  are indistinguishable  
354 for  $\mathcal{A}$ , and it means for a PPT adversary  $\mathcal{A}$ , the probability of distinguishing between  $\text{Real}_{\mathcal{A}}(\lambda)$   
355 and  $\text{Ideal}_{\mathcal{A},S}(\lambda)$  is negligible, so we have:  
356  $|\Pr[\text{Real}_{\mathcal{A}}(\lambda) = 1] - \Pr[\text{Ideal}_{\mathcal{A},S}(\lambda) = 1]| \leq \text{negl}(\lambda)$ . Therefore, our scheme satisfies CKA2-security.

357

## 358 Performance Evaluation

359 In this section, we evaluate the performance of our scheme by constructing a series of experiments,  
360 and compare the experimental results with Li et.al (2021) and Guo, Zhang & Jia (2020). Since  
361 Guo, Zhang & Jia (2020) does not support multi-keyword search over encrypted data, we compare  
362 our scheme with Li et.al (2021) which supports multi-keyword search. Besides, we compare our  
363 scheme with Guo, Zhang & Jia (2020) in terms of dynamic operations.

364 We deploy our experiments on a local machine with an Intel Core i7-8550U CPU of 1.80GHz,  
365 8GB RAM. We use HMAC-SHA-256 for the pseudo-random functions  $F$ , SHA-256 for the hash  
366 function  $H$ . We use AES as the encryption algorithm to encrypt files. We implement the  
367 algorithms in data owner, data user and server using Python and construct the smart contract using  
368 Solidity, and the smart contract is tested in with the Ethereum blockchain using a local simulated  
369 network TestRPC.

370 For the dataset, we adopt a real-world dataset, Enron email dataset (William, 2015), which  
371 contains more than 517 thousand documents. We utilize the Porter Stemmer to extract more than  
372 1.67 million keywords and filter that meaningless keywords, such as “of”, “the”. At last, we build  
373 an inverted index with those keywords to improve the search efficiency of the experiment.

374

## 375 Evaluation of Setup

376 In setup phase, data owner encrypts the files, calculates the initial verification values of ciphertexts,  
377 generates the bitmap indexes of keywords, stores them in  $T, B$  and  $T_B$ , respectively.

378 First, we compare the setup time of our scheme with Li et.al (2021) and Guo, Zhang & Jia  
379 (2020), the setup time is related to the number of files in the index and the number of keywords  
380 included in each file. Figure 3 shows the setup time with different number of keywords in each file  
381 while the number of files is fixed at 3137, Fig.4 shows the setup time with different number of  
382 files when the number of keywords in each file is fixed at 20. Both figures show that the setup  
383 time is affected by the number of keywords in each file and the number of files, and the setup time  
384 increases linearly concerning the number of keywords and files.

385 Furthermore, Fig.3 and Fig.4 illustrate that our scheme is more efficient than Li et.al (2021) and  
386 Guo, Zhang & Jia (2020) under the same condition in setup time. Since Guo, Zhang & Jia (2020)  
387 utilizes the linked list instead of bitmap to build the index, it requires more time than the other  
388 schemes. Our scheme takes less time than Li et.al (2021), the reason is that Li et.al (2021) adopts  
389 RSA accumulator based on public key encryption to verify multi-keyword search results,

390 in contrast, our scheme utilizes hash functions to verify search results, which reduces the  
391 computational overhead greatly.

392

### 393 **Evaluation of Search**

394 For the performance of our scheme, we compare the search time of our scheme with Li et.al (2021).  
395 Moreover, to better evaluate the performance of the scheme in multi-keyword search, we perform  
396 two settings in a query: 5 keywords and 10 keywords, respectively. In figures, the suffix of the  
397 icon indicates the number of keywords in a query, i.e., Our scheme\_5 indicates the search time  
398 spent in our scheme during a query which contains 5 keywords, Our scheme\_10 indicates the  
399 search time spent in our scheme during a query which contains 10 keywords, similarly, Li et.al  
400 (2021)\_5 and Li et.al (2021)\_10 indicates the search time spent in Li et.al (2021) during a query  
401 which contains 5 keywords and 10 keywords, respectively.

402 Figure 5 shows the search time with different number of keywords in each file when the number  
403 of files is fixed at 3137, and Fig.6 shows the search time with different number of files when the  
404 number of keywords in each file is fixed at 20. Both figures show that the search time is affected  
405 by the number of keywords in each file and the number of files, and the search time increases sub-  
406 linearly with the number of keywords and files.

407 From Fig. 5 and Fig. 6, we can see that the more keywords included in a query, the more time  
408 it takes, this is because the more keywords, the search algorithm spends more time to calculate  
409 matched files. Another conclusion can be drawn that our scheme is more efficient than Li et.al  
410 (2021) in search, the reason is that the same as the setup algorithm, Li et.al (2021) takes more time  
411 to calculate the verification values.

412

### 413 **Evaluation of Verify**

414 Here, we evaluate the performance of our scheme in verification, we verify the results of searching  
415 for 5 keywords and 10 keywords respectively, and compares the verification time with Li et.al  
416 (2021),the comparison results are shown in Fig.7 and Fig.8. Figure 7 shows the verification time  
417 with different number of keywords in each file when the number of files is fixed at 3137, and Fig.8  
418 shows the verification time with different number of files when the number of keywords in each  
419 file is fixed at 20. From those two figures, we can see that the verification time is affected by the  
420 number of keywords in each file and the number of files, the verification time increases with the  
421 number of keyword and files.

422 Both figures shows that our scheme gains a higher verification efficiency than Li et.al (2021),  
423 the reason is that Li et.al (2021) takes additional time to compute  $\mathcal{B}_f = y_i \oplus u_i$ , where  
424  $u_i = F(K_{f_i} || r_i)$ ,  $K_{f_i} = G(K_3, f_i)$ . In addition, the initial verification values in Li et.al (2021) are  
425 stored in untrusted server and the verification is performed by the data user, both the server and  
426 the user may forge the verification results, while in our scheme, the values are stored in blockchain  
427 and the verification is performed by blockchain, cannot be tampered with, hence, our scheme is  
428 more fair and secure in verification.

429

## 430 Evaluation of Update

431 Dynamic update is the important function in SSE, so we evaluate the performance of our scheme  
432 in dynamic update by adding a file containing multiple keywords. Figure 9 and Fig.10 show the  
433 performance of our scheme, Li et.al (2021) and Guo, Zhang & Jia (2020) in update time,  $\_5$  and  
434  $\_10$  indicate that the update document contains 5 keywords and 10 keywords, respectively. We  
435 observe that the update time increases with the number of files, since the more files, the longer of  
436 the bitmap corresponding to a keyword, then the update algorithm performs more operations when  
437 calculating  $v_B \leftarrow \mathcal{B}_{w_j} \oplus H(u_{w_j} || st)$ . Moreover, the update time is related to the number of  
438 keywords contained in the update file, since the more keywords the file contains, the more indexes  
439 to update.

440

## 441 Conclusions

442 In this paper, we present an efficient verifiable multi-keyword search SSE scheme based on  
443 blockchain, which accomplishes efficient multi-keyword search and verification. In our scheme,  
444 the yardstick of the file is stored on the blockchain, and the verification of the search results is also  
445 completed by the blockchain, thus the fairness and reliability of the verification can be ensured. In  
446 addition, our solution supports the dynamic update of files and guarantees forward security during  
447 the update. Formal security analysis and experimental results show that our scheme is CKA2-  
448 security and efficient. Our scheme can be widely used in cloud storage systems such as data  
449 outsourcing, cloud-based IoT (Ge et.al, 2021), medical cloud data (Li et.al, 2020),etc., helping to  
450 achieve efficient multi-keyword searches, and ensuring the integrity and credibility of search  
451 results.

452

453

## 454 References

- 455 [1] Song DX, Wagner D, Perrig A. 2000. Practical Techniques for Searches on Encrypted Data.  
456 In: 2000 IEEE Symposium on Security and Privacy. IEEE, 44–55 DOI:  
457 10.1109/SECPRI.2000.848445.
- 458 [2] Curtmola R, Garay J, Kamara S, Ostrovsky R. 2006. Searchable Symmetric  
459 Encryption:Improved Definitions and Efficient Constructions. In 13th ACM Conference on  
460 Computer and Communications Security. ACM, 79–88.
- 461 [3] Wang C, Cao N, Li J, Ren K. 2010. Secure Ranked Keyword Search over Encrypted Cloud  
462 Data. in IEEE 30th international conference on distributed computing systems. IEEE, 253-262  
463 DOI: 10.1109/ICDCS.2010.34.
- 464 [4] Cash D, Jarecki S, Jutla CS, Krawczyk H, Rosu M, Steiner M. 2013. Highly-scalable  
465 Searchable Symmetric Encryption with Support for Boolean Queries. In Advances in  
466 Cryptology-CRYPTO, 353–373.
- 467 [5] Lai S, Patranabis S, Sakzad A, Liu J, Mukhopadhyay D, Steinfeld R, Sun S, Liu D, Zuo C.  
468 2018. Result pattern hidingsearchable encryption for conjunctive queries. Proceedings of the

469 2018 ACM SIGSAC Conference on Computer and Communications Security. ACM, 745–762  
470 DOI: 10.1145/3243734.3243753.

471 [6] Xu G, Li HW, Dai YS, Yang K, Lin XD. 2019. Enabling Efficient and Geometric Range  
472 Query with Access Control over Encrypted Spatial Data. *IEEE Transactions on Information*  
473 *Forensics and Security*,14(4): 870-885 DOI: 10.1109/TIFS.2018.2868162.

474 [7] Qi C, Gong G. 2012. Verifiable Symmetric Searchable Encryption for Semi-Honest-but-  
475 Curious Cloud Servers. In: *Proc of the IEEE International Conference on Communications*.  
476 *IEEE*, 917-922 DOI: 10.1109/ICC.2012.6364125.

477 [8] Kurosawa K, Ohtaki Y. 2012. UC-Secure Searchable Symmetric Encryption. In: *Proc of the*  
478 *International Conference on Financial Cryptography and Data Security*. Springer, 285-298 DOI:  
479 10.1007/978-3-642-32946-3\_21.

480 [9] Zhu X, Liu Q, Wang G. 2016. A Novel Verifiable and Dynamic Fuzzy Keyword Search  
481 Scheme over Encrypted Data in Cloud Computing. In: *Proc of the IEEE Trustcom/BigDataSE/I*  
482 *SPA*. *IEEE*, 845-851 DOI: 10.1109/TrustCom.2016.0147.

483 [10] Liu Q, Nie XH, Liu XH, Peng T, Wu J. 2017. Verifiable Ranked Search over dynamic  
484 encrypted data in cloud computing. In: *Proc of the 2017 IEEE/ACM 25th International*  
485 *Symposium on Quality of Service*. *IEEE*, DOI: 10.1109/IWQoS.2017.7969156.

486 [11] Zhang Z, Wang J, Wang Y. 2019. Towards Efficient Verifiable Forward Secure Searchable  
487 Symmetric Encryption. In: *Proc of the European Symposium on Research in Computer Security*.  
488 *LNCS*, 11736: 304-321 DOI: 10.1007/978-3-030-29962-0\_15.

489 [12] Ge X, Yu J, Zhang H, Hu CY, Li ZP, Qin Z, Hao R. 2019. Towards Achieving Keyword  
490 Search over Dynamic Encrypted Cloud Data with Symmetric-Key based Verification. *IEEE*,  
491 18:490-504 DOI: 10.1109/TDSC.2019.2896258.

492 [13] AZRAOUI M, ELKHIYAOU K, ÖNEN M. 2015. Publicly Verifiable Conjunctive  
493 Keyword Search in Outsourced Databases. *IEEE Conference on Communications and Network*  
494 *Security*, Florence. *IEEE*, 619–627 DOI:10.1109/CNS.2015.7346876

495 [14] Wang J, Chen X, Sun SF, Liu JK, Man HA, Zhan ZH. 2018. Towards Efficient Verifiable  
496 Conjunctive Keyword Search for Large Encrypted Database. In: *Proc of the European*  
497 *Symposium on Research in Computer Security*. Springer, 83-100 DOI:  
498 10.1007/978-3-319-98989-1\_5

499 [15] Sun W, Liu X, Lou W, Hou YT, Li H. 2015. Catch You if You Lie to Me: Efficient  
500 verifiable conjunctive keyword search over large dynamic encrypted cloud data. In: *Proc of the*  
501 *IEEE Conf. on Computer Communications*. *IEEE*, 2110-2118 DOI:  
502 10.1109/INFOCOM.2015.7218596

503 [16] Wan ZZ, Deng RH. 2018. VPSearch: Achieving Verifiability for Privacy-Preserving Multi-  
504 Keyword Search over Encrypted Cloud Data. *IEEE Transactions on Dependable and Secure*  
505 *Computing*, 15:1083-1095 DOI: 10.1109/TDSC.2016.2635128.

506 [17] Li F, Ma JF, Miao YB, Jiang Q, Liu XM, Kim-Kwang RC. 2021. Verifiable and Dynamic  
507 Multi-keyword Search over Encrypted Cloud Data Using Bitmap. *IEEE Transactions on Cloud*  
508 *Computing*,1-14 DOI: 10.1109/TCC.2021.3093304.

509 [18] Hu S, Cai C, Wang Q, Wang C, Luo X, Ren K. 2018. Searching an Encrypted Cloud Meets  
510 Blockchain: A Decentralized, Reliable and Fair Realization. In: Proc of the IEEE Conference on  
511 Computer Communications. IEEE, 792-800 DOI: 10.1109/INFOCOM.2018.8485890.

512 [19] Cai C, Weng J, Yuan X, Wang C. 2021. Enabling Reliable Keyword Search in Encrypted  
513 Decentralized Storage with Fairness. IEEE Trans on Dependable and Secure Computing.  
514 18(1):131-144 DOI: 10.1109/TDSC.2018.2877332.

515 [20] Li HG, Tian HB, Zhang FG, He JJ. 2019. Blockchain-based Searchable Symmetric  
516 Encryption Scheme. Computers & Electrical Engineering.73:32-45 DOI:  
517 10.1016/j.compeleceng.2018.10.015

518 [21] Guo Y, Zhang C, Jia X. 2020. Verifiable and Forward-secure Encrypted Search Using  
519 Blockchain Techniques. IEEE International Conference on Communications. IEEE, DOI:  
520 10.1109/ICC40277.2020.9148612.

521 [22] Spiegler I, Maayan R. 1985. Storage and Retrieval Considerations of Binary Data Bases.  
522 Information processing & management, 21(3): 233–254 DOI: 10.1016/0306-4573(85)90108-6.

523 [23] Soleimanian A, Khazaei S. 2019. Publicly Verifiable Searchable Symmetric Encryption  
524 Based on Efficient Cryptographic Components. Designs, Codes and Cryptography, 87(1): 123–  
525 147 DOI: 10.1007/s10623-018-0489-y.

526 [24] Kamara S, Papamanthou C, Roeder T. 2012. Dynamic Searchable Symmetric Encryption. in  
527 Proc. ACM Conference on Computer and Communications Security. ACM, 965–976 DOI:  
528 10.1145/2382196.2382298.

529 [25] Cash D, Grubbs P, Perry J, Ristenpart T. 2015. Leakage-abuse Attacks Against Searchable  
530 Encryption. In: Proc. of the 22nd ACM SIGSAC Conference on Computer and Communications  
531 Security. ACM, 668–679 DOI: 10.1145/2810103.2813700.

532 [26] Zhang YP, Katz J, Papamanthou C. 2016. All Your Queries are Belong to Us: the power of  
533 file-injection attacks on searchable encryption. In: Proc. of the 25th USENIX Conf. on Security  
534 Symposium. Austin, 707–720.

535 [27] Abdelraheem MA, Gehrman C, Lindstrom M, Nordahl C. 2016. Executing Boolean  
536 Queries on An Encrypted Bitmap Index. In Proc. ACM on Cloud Computing Security  
537 Workshop. ACM, 11–22 DOI: 10.1145/2996429.2996436.

538 [28] Zuo C, Sun S, Liu JK, Shao J, Pieprzyk J. 2019. Dynamic Searchable Symmetric  
539 Encryption with Forward and Stronger Backward Privacy. In Proc. European Symposium on  
540 Research in Computer Security. Springer, 283–303 DOI: 10.1007/978-3-030-29962-0\_14.

541 [29] William WC. 2015. Enron email dataset. Available at <http://www.cs.cmu.edu/~enron/>.

542 [30] Maryam H, Parvaneh A, Hamid HSJ. 2021. Dynamic Secure Multi-keyword Ranked Search  
543 over Encrypted Cloud Data. Journal of Information Security and Applications. 61:1-12 DOI:  
544 10.1016/j.jisa.2021.102902

545 [31] Miao Y, Deng RH, Choo KKR, Liu X, Ning J, Li H. 2021. Optimized Verifiable Fine-  
546 grained Keyword Search in Dynamic Multi-Owner Settings. IEEE Transactions on Dependable  
547 and Secure Computing. 18(4):1804-1820 DOI: 10.1109/TDSC.2019.2940573.

- 548 [32] Chen CM, Tie Z, Wang EK, Khan MK, Kumar S, Kumari S. 2021. Verifiable Dynamic  
549 Ranked Search with Forward Privacy over Encrypted Cloud Data. *Peer-to-Peer Networking and*  
550 *Applications*, 14:2977–2991 DOI: /10.1007/s12083-021-01132-3.
- 551 [33] Ge XR, Yu J, Chen F, Kong F, Wang H. 2021. Towards Verifiable Phrase Search over  
552 Encrypted Cloud-based IoT Data. *IEEE Internet of Things Journal*.8(16):12902 – 12918 DOI:  
553 10.1109/JIOT.2021.3063855.
- 554 [34] Liu X, Yang X, Luo Y, Zhang Q. 2021. Verifiable Multi-keyword Search Encryption  
555 Scheme with Anonymous Key Generation for Medical Internet of Things. *IEEE Internet of*  
556 *Things Journal*. DOI: 10.1109/JIOT.2021.3056116.
- 557 [35] Liang YR, Li YP, Cao Q, Ren F. VPAMS: Verifiable and Practical Attribute-based Multi-  
558 keyword Search Over Encrypted Cloud Data. *Journal of Systems Architecture*. DOI:  
559 10.1016/j.sysarc.2020.101741.
- 560 [36] Liang Y, Li Y, Zhang K, Ma L. 2021. DMSE: Dynamic Multi-keyword Search Encryption  
561 Based on Inverted Index. *Journal of Systems Architecture*. DOI: 10.1016/j.sysarc.2021.102255.
- 562 [37] Li H, Yang Y, Dai Y, Yu S, Xiang Y. 2020. Achieving Secure and Efficient Dynamic  
563 Searchable Symmetric Encryption over Medical Cloud Data. *IEEE Transactions on Cloud*  
564 *Computing*. 8(2):484-494 DOI: 10.1109/TCC.2017.2769645.
